# Supplementary material for: Solar-Driven Thermocatalytic Synthesis of Octahydroquinazolinone Using Novel Polyvinylchloride (PVC)-Supported Aluminum Oxide (Al2O3) Catalysts
Source: MDPI journal article supplement (doi:10.3390/ma16072835), 2023-04-02

## Supporting Information

# Solar-Driven Thermocatalytic Synthesis of Octahydroquinazolinone Using Novel Polyvinylchloride (PVC)-Supported Aluminum Oxide ( $\text{Al}_2\text{O}_3$ ) Catalysts

Abdulrahman I. Alharthi <sup>1</sup>, Mshari Alotaibi <sup>1</sup>, Amani M. Alansi <sup>2</sup>, Talal F. Qahtan <sup>3</sup>, Imtiaz Ali <sup>4</sup>, Matar. N. Al-Shalwi <sup>5</sup> and Md. Afroz Bakht <sup>1,\*</sup>

<sup>1</sup> Chemistry Department, College of Science and Humanities Studies, Prince Sattam Bin Abdulaziz University, P.O. Box 83, Al-Kharj 11942, Saudi Arabia

<sup>2</sup> Chemistry Department, King Saud University, Riyadh 12372, Saudi Arabia

<sup>3</sup> Physics Department, College of Science and Humanity Studies, Prince Sattam Bin Abdulaziz University, P.O. Box 83, Al-Kharj 11942, Saudi Arabia

<sup>4</sup> Preparatory College, Prince Sattam Bin Abdulaziz University, P.O. Box 83, Al-Kharj 11942, Saudi Arabia

<sup>5</sup> Electrochemical Sciences Research Chair (ESRC), Department of Chemistry, College of Science, King Saud University, P.O. Box 2455, Riyadh 11451, Saudi Arabia

\* Correspondence: m.bakht@psau.edu.sa; Tel.: +966-55375-3763

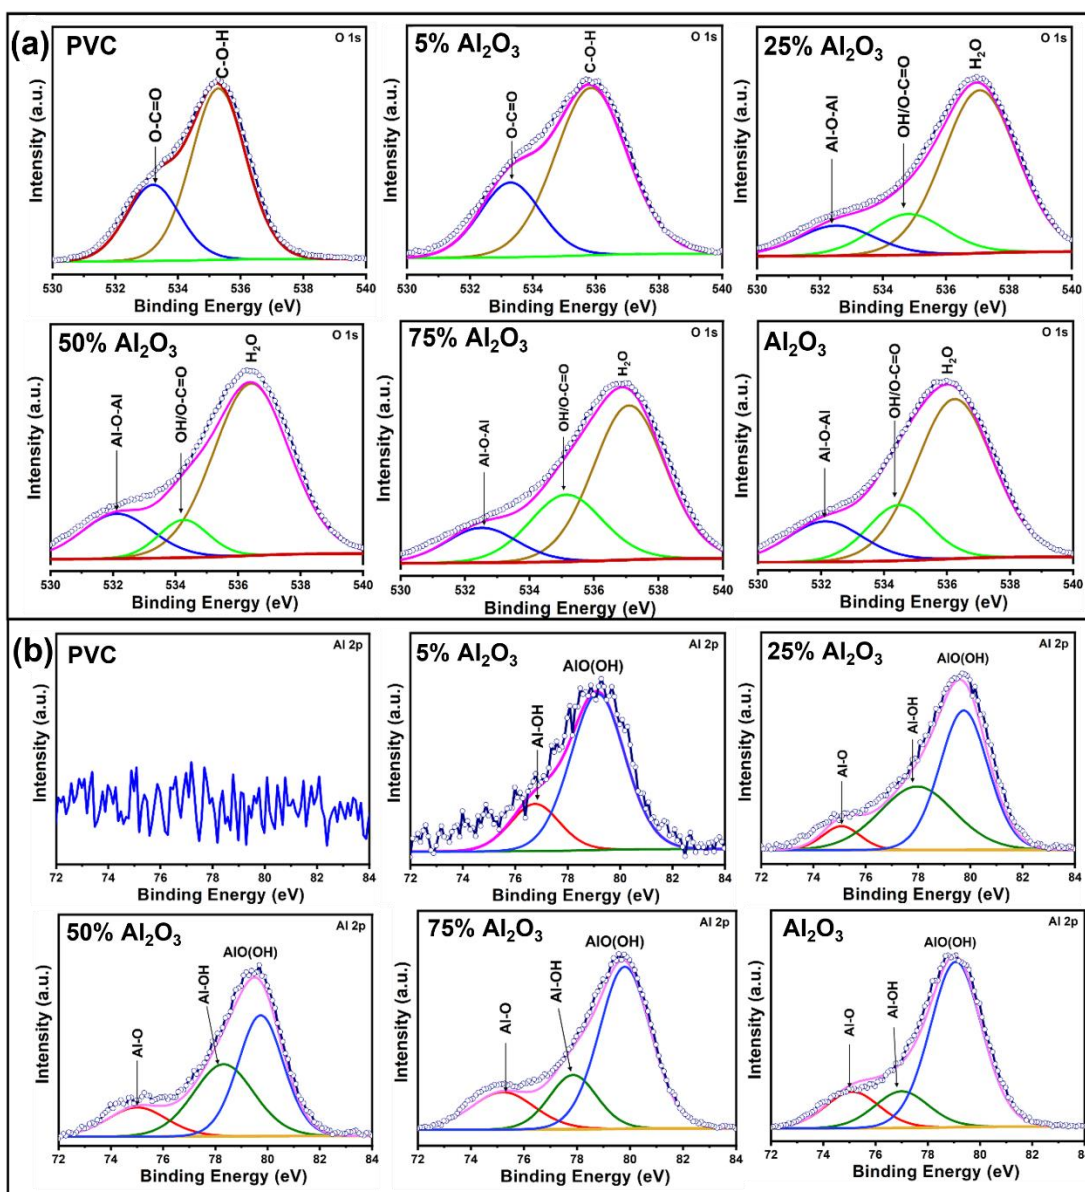

**Figure S1.** O1s XPS spectra (a) and C 1s (b), and Al 2p spectra of  $\text{Al}_2\text{O}_3$ , PVC, and  $\text{Al}_2\text{O}_3/\text{PVC}$  samples containing different aluminum trioxide amounts as indicated.

**Table S1** the ratios of the electronic state of the elements for the as-prepared Al<sub>2</sub>O<sub>3</sub>/PVC catalysts

| <b>Catalyst/Atomic<br/>ratio of<br/>elements</b> | <b>C</b> | <b>Cl</b> | <b>O</b> | <b>Al</b> | <b>Ca</b> | <b>S</b> |
|--------------------------------------------------|----------|-----------|----------|-----------|-----------|----------|
| <b>PVC</b>                                       | 61.85    | 8.73      | 29.42    | 0         | 0         | 0        |
| <b>5% Al<sub>2</sub>O<sub>3</sub></b>            | 56.15    | 10.71     | 28.78    | 4.01      | 0         | 0        |
| <b>25% Al<sub>2</sub>O<sub>3</sub></b>           | 34.07    | 7.27      | 40.89    | 15.09     | 2.04      | 0.01     |
| <b>50% Al<sub>2</sub>O<sub>3</sub></b>           | 20.45    | 4.04      | 54.92    | 18.44     | 2.12      | 0.03     |
| <b>60% Al<sub>2</sub>O<sub>3</sub></b>           | 14.89    | 2.64      | 56.53    | 22.38     | 2.95      | 0.61     |
| <b>75% Al<sub>2</sub>O<sub>3</sub></b>           | 12.77    | 2.13      | 53.90    | 28.25     | 2.13      | 0.04     |
| <b>Al<sub>2</sub>O<sub>3</sub></b>               | 7.04     | 0         | 63.46    | 27.38     | 2.08      | 0.03     |

# NMR Spectra of Synthesized Compounds 4a-h

## 4a-HNMR

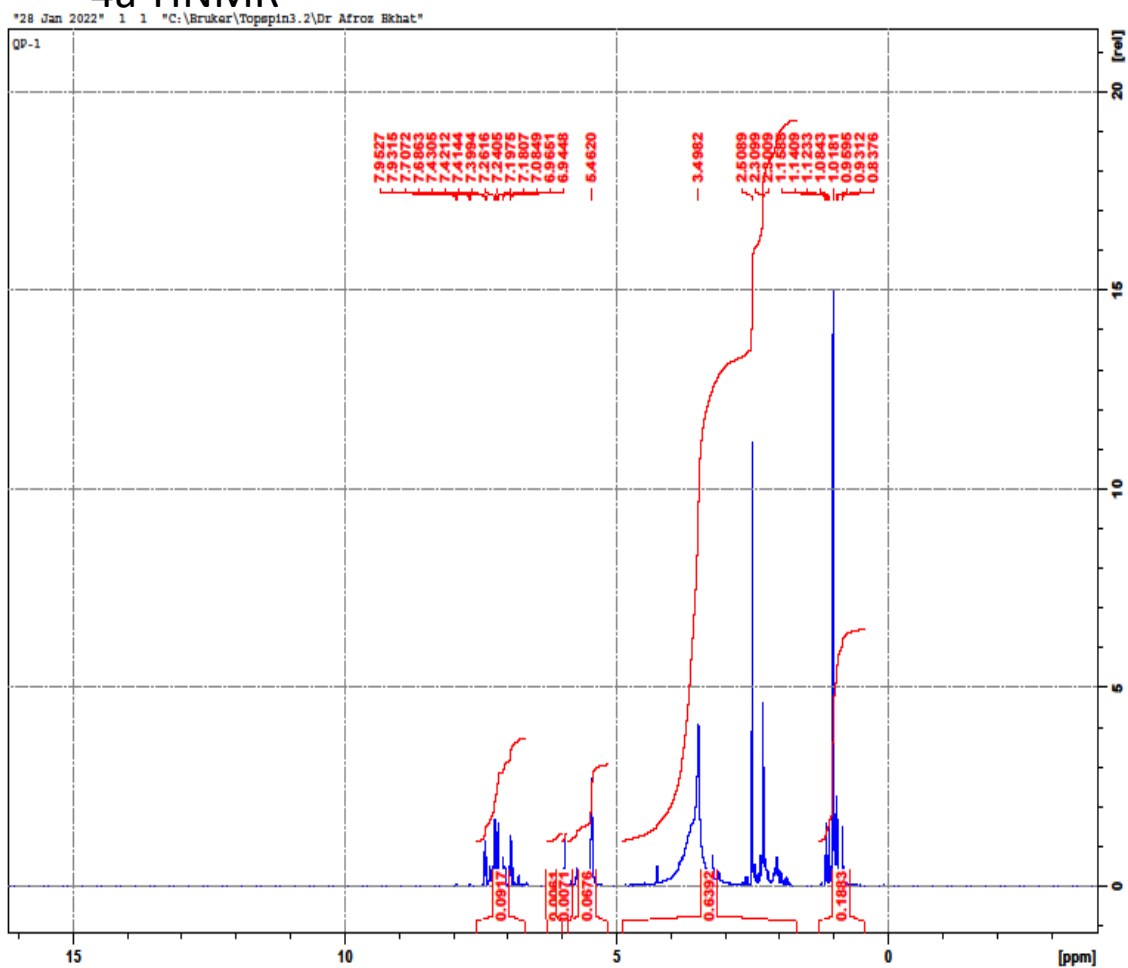

# 4a-<sup>13</sup>CNMR

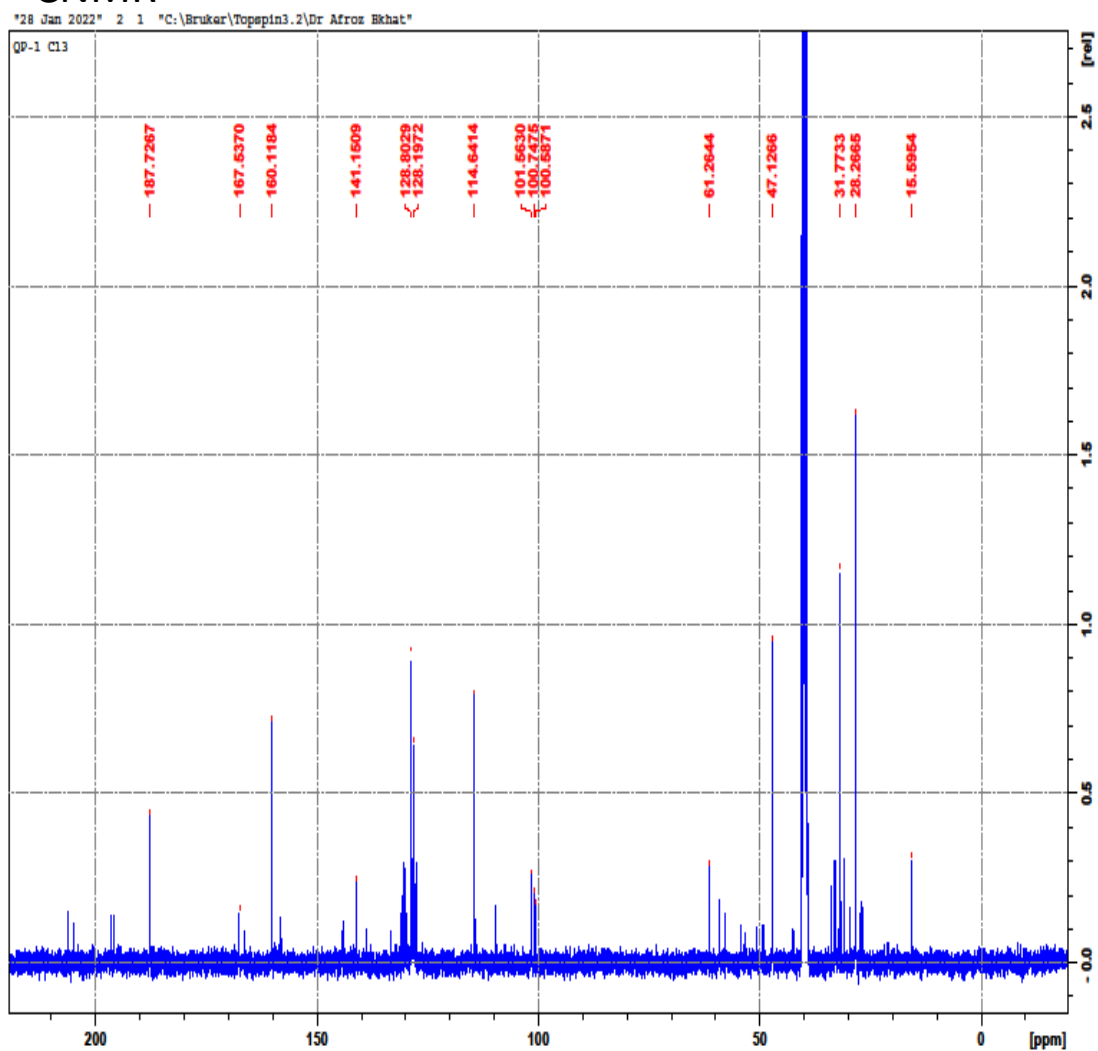

# 4b-<sup>13</sup>CNMR

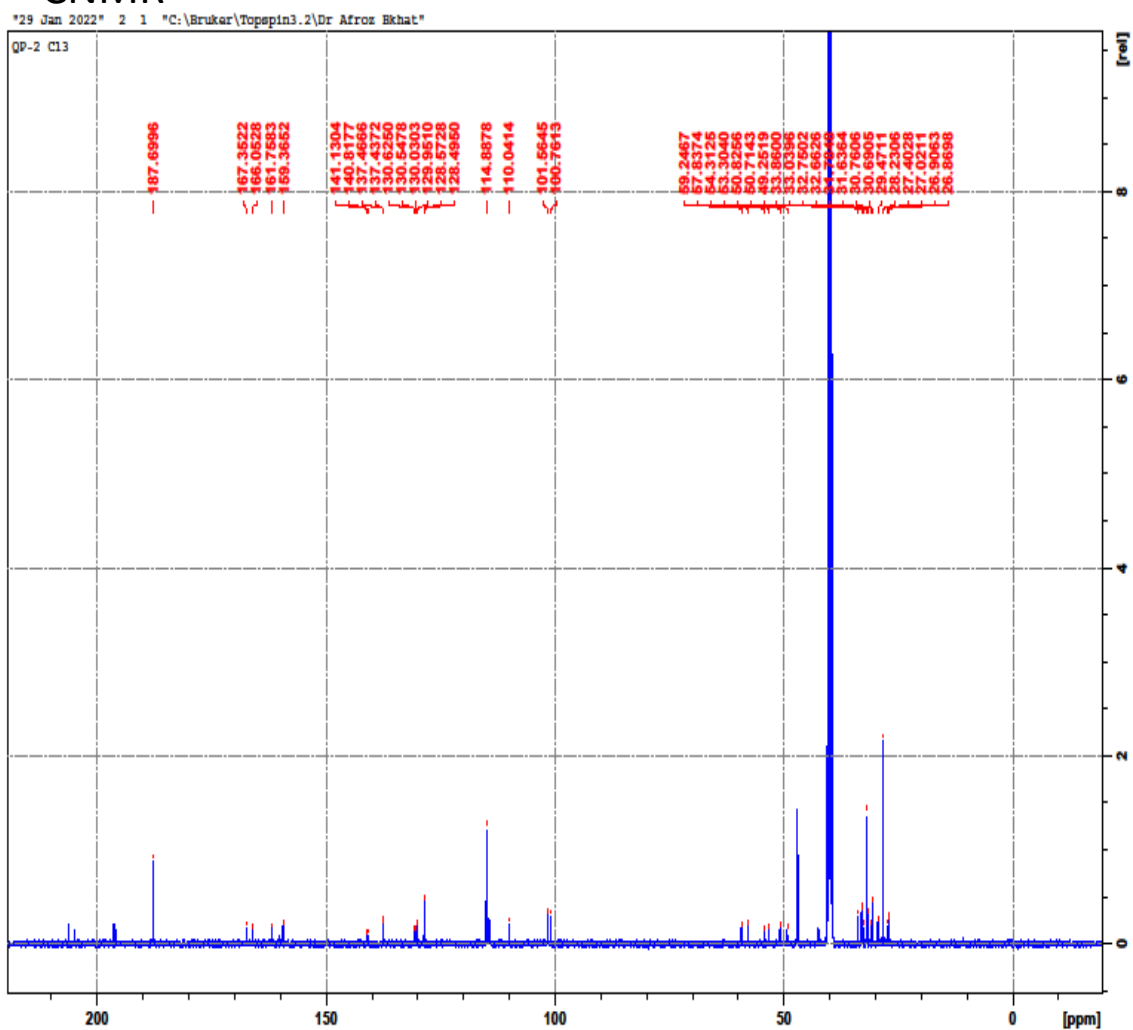

# 4b-HNMR

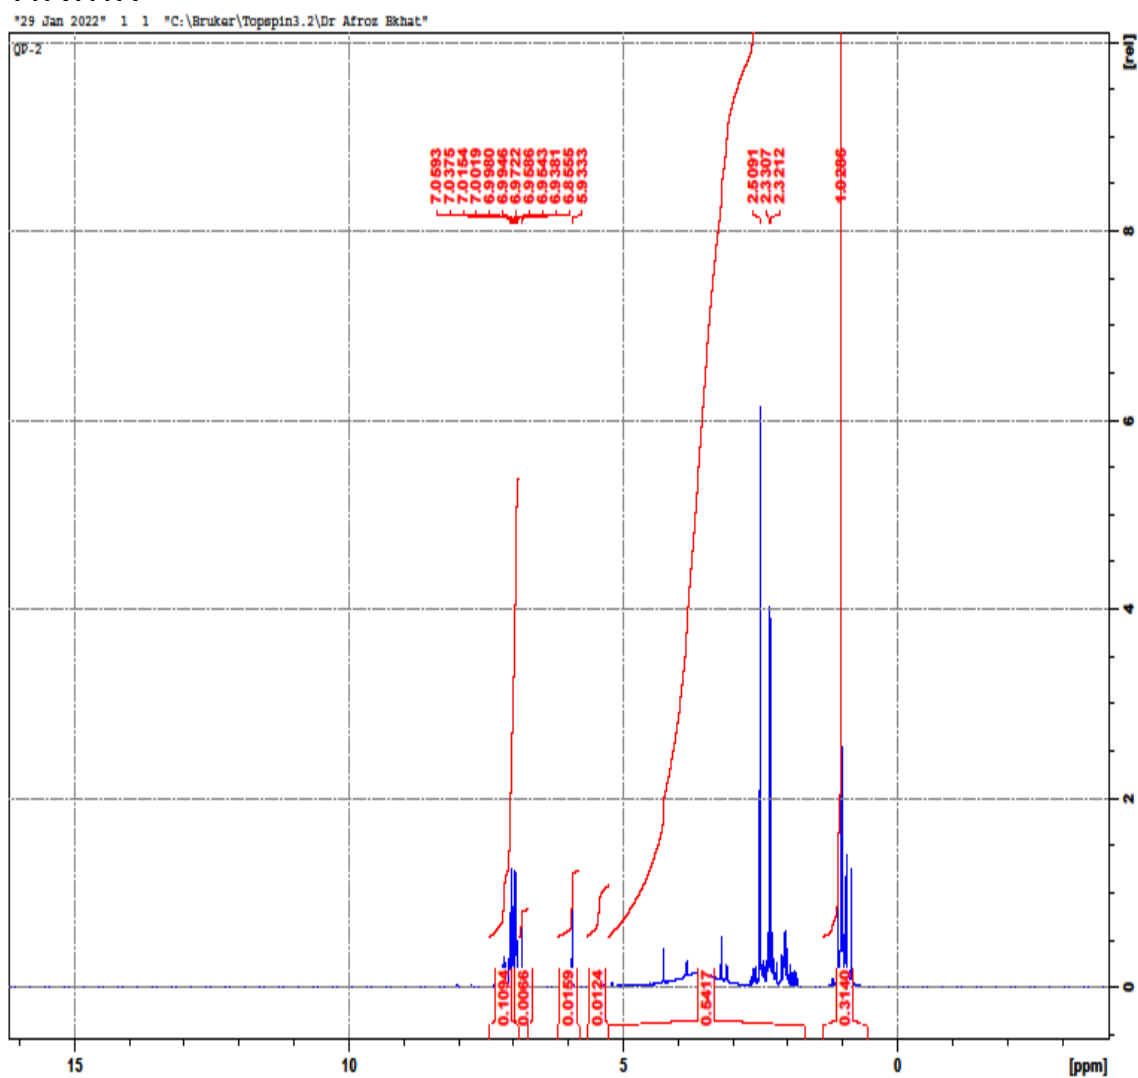

# 4c-<sup>13</sup>CNMR

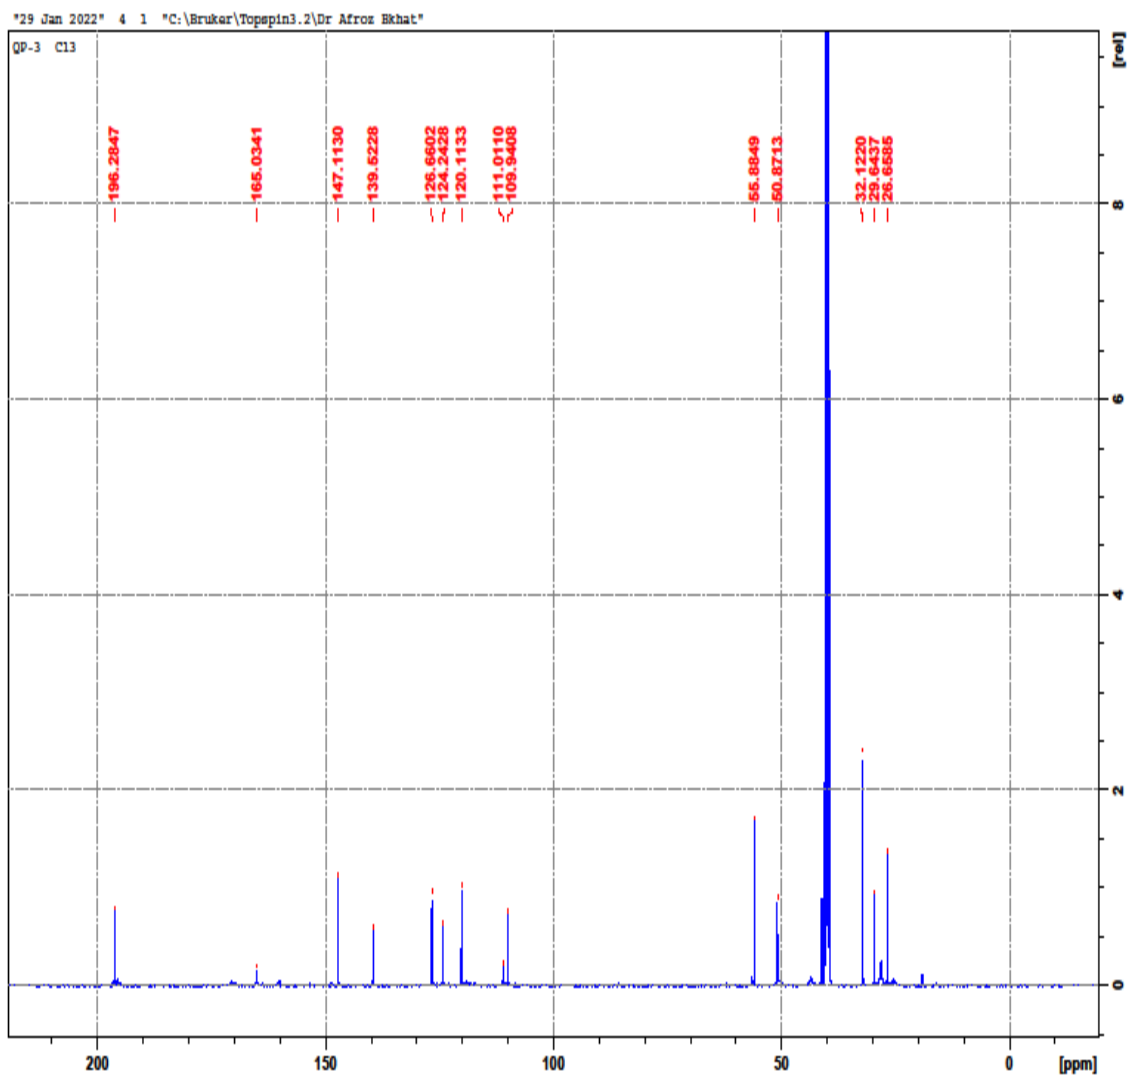



# 4c-HNMR

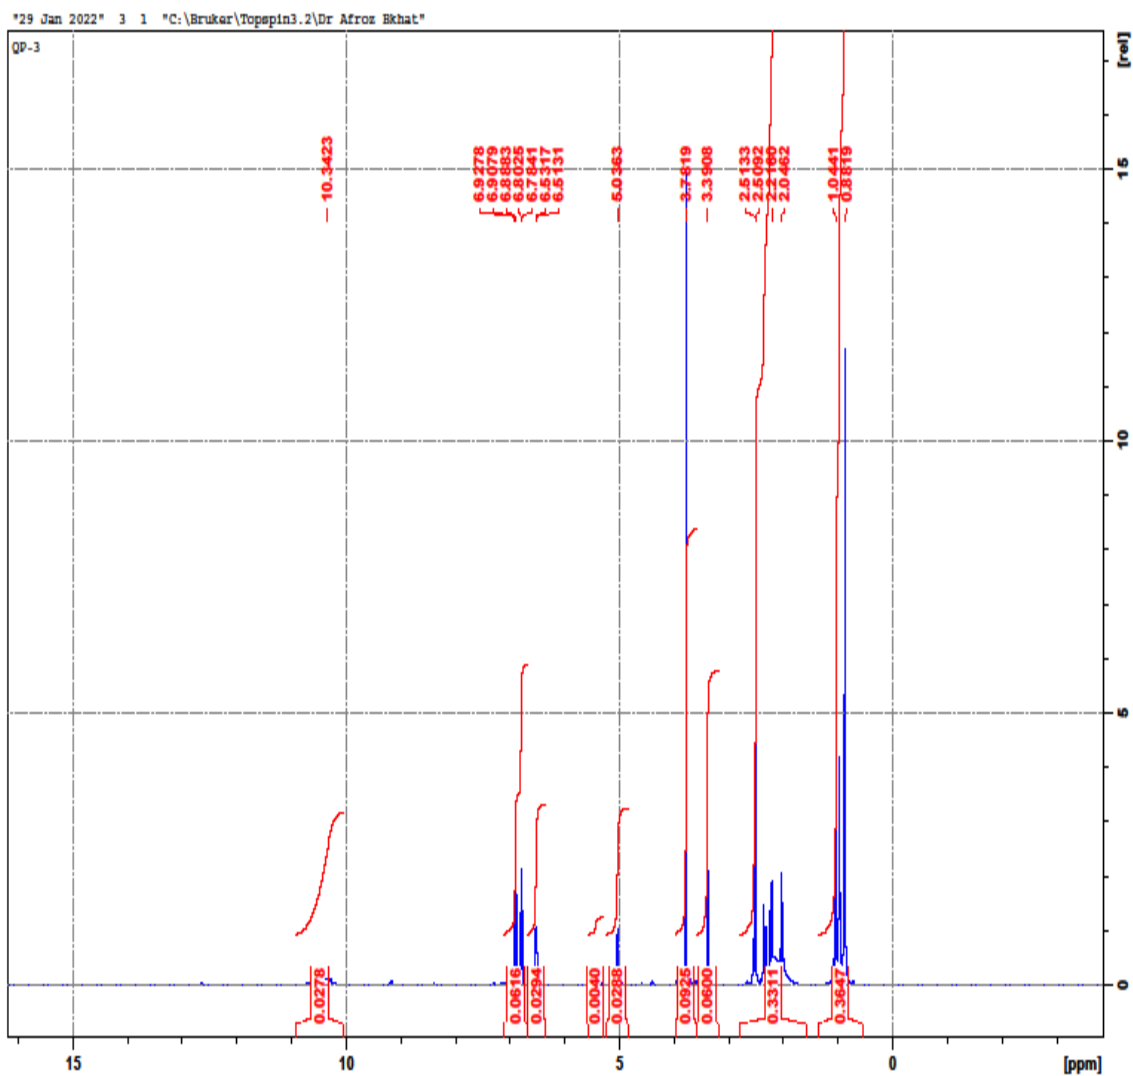

# 4d-<sup>13</sup>CNMR

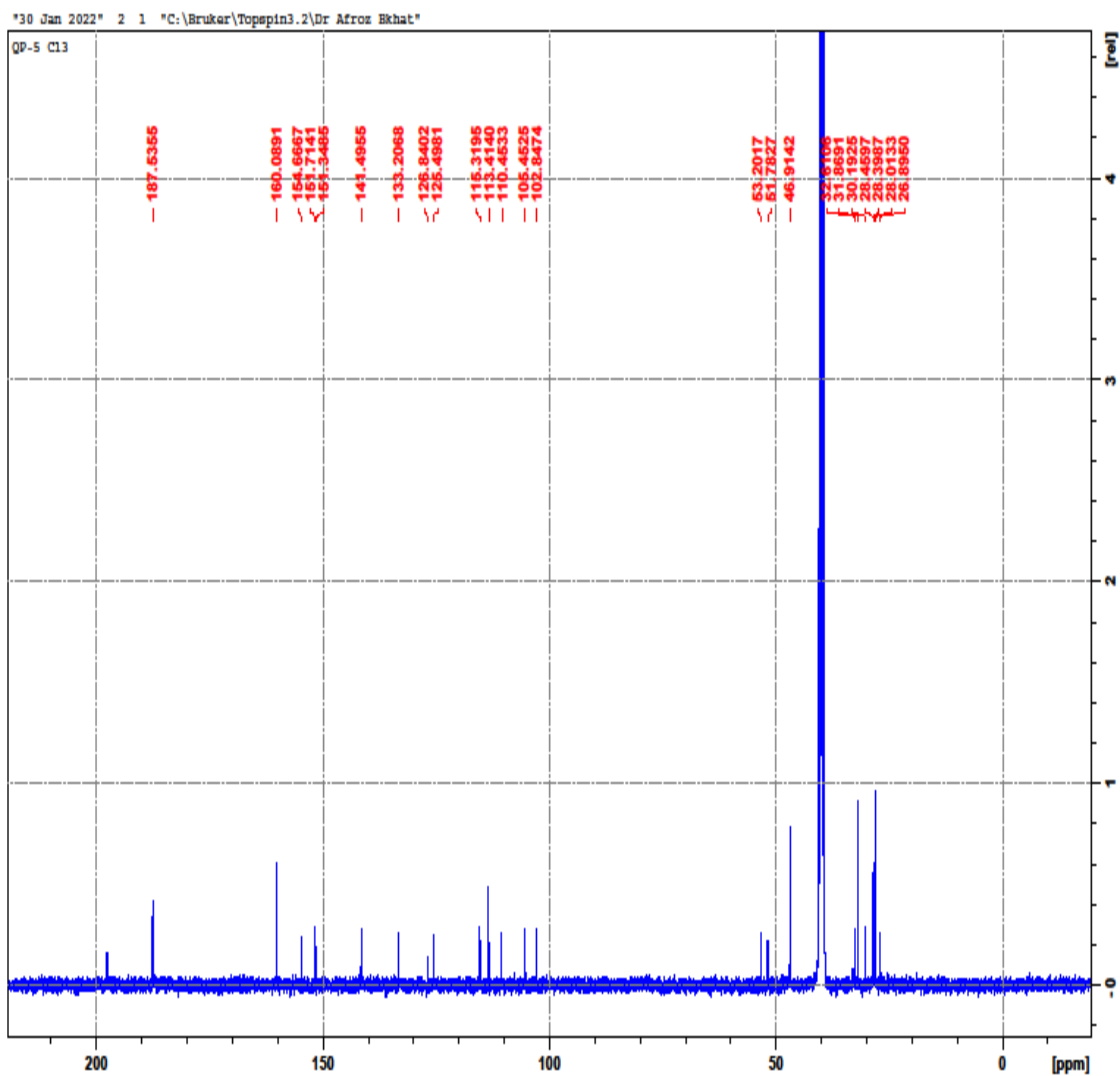

# 4d-HNMR

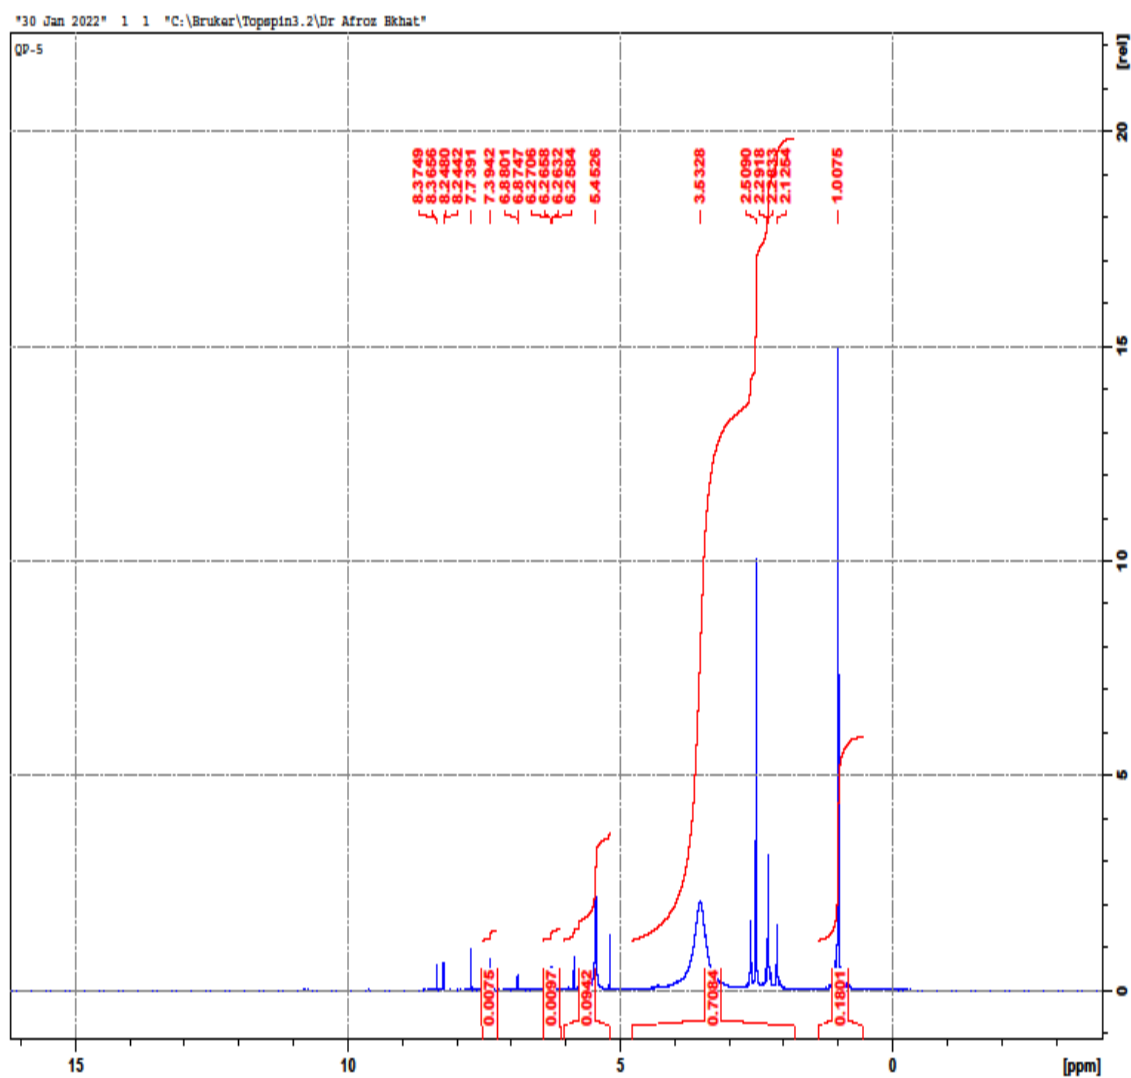

# 4e-<sup>13</sup>CNMR

"30 Jan 2022" 6 1 "C:\Bruker\Topspin3.2\Dr Afroz Bkhat"

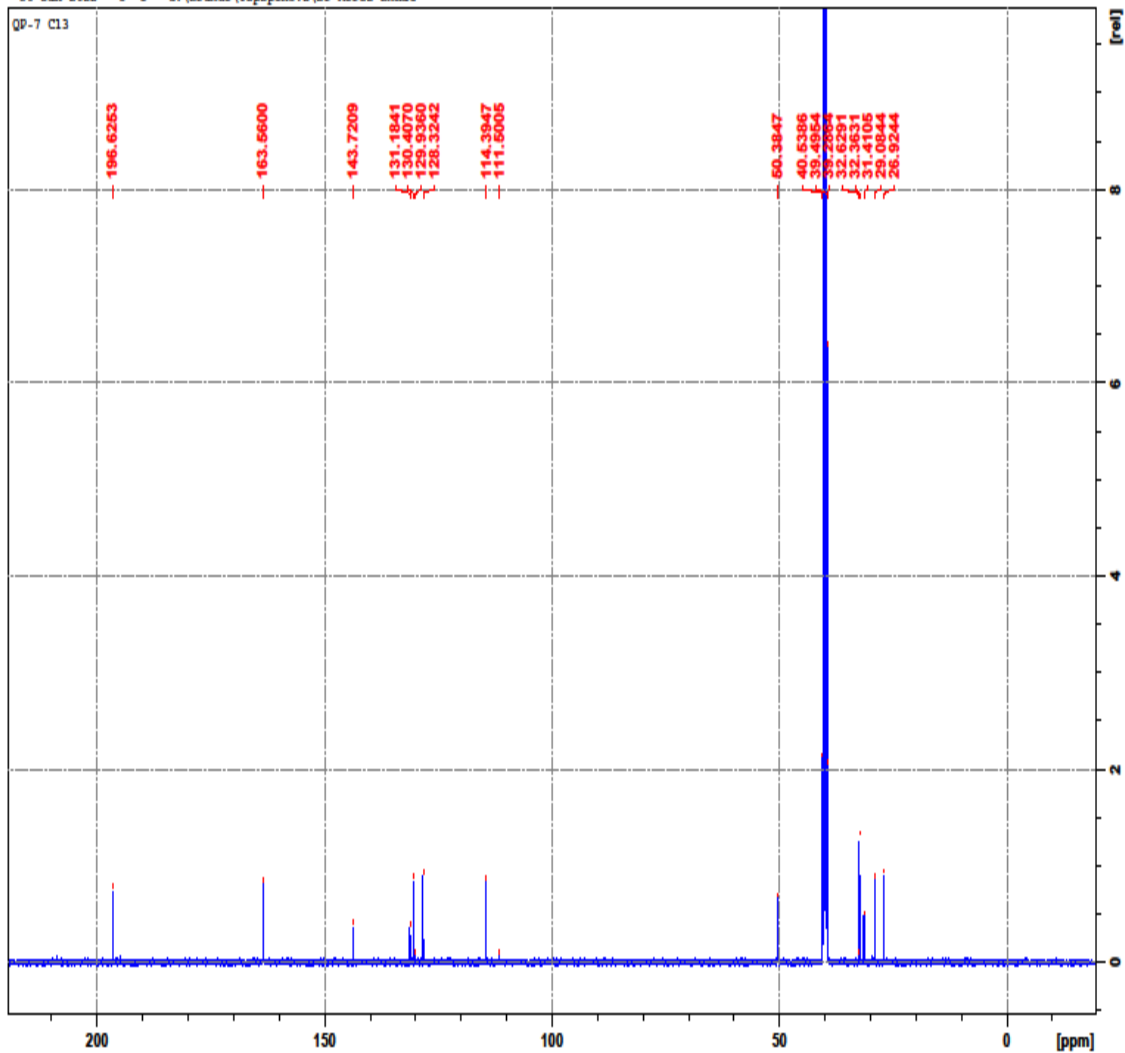

# 4e-HNMR

"30 Jan 2022" 5 1 "C:\Bruker\Topspin3.2\Dr Afroz Bkhat"

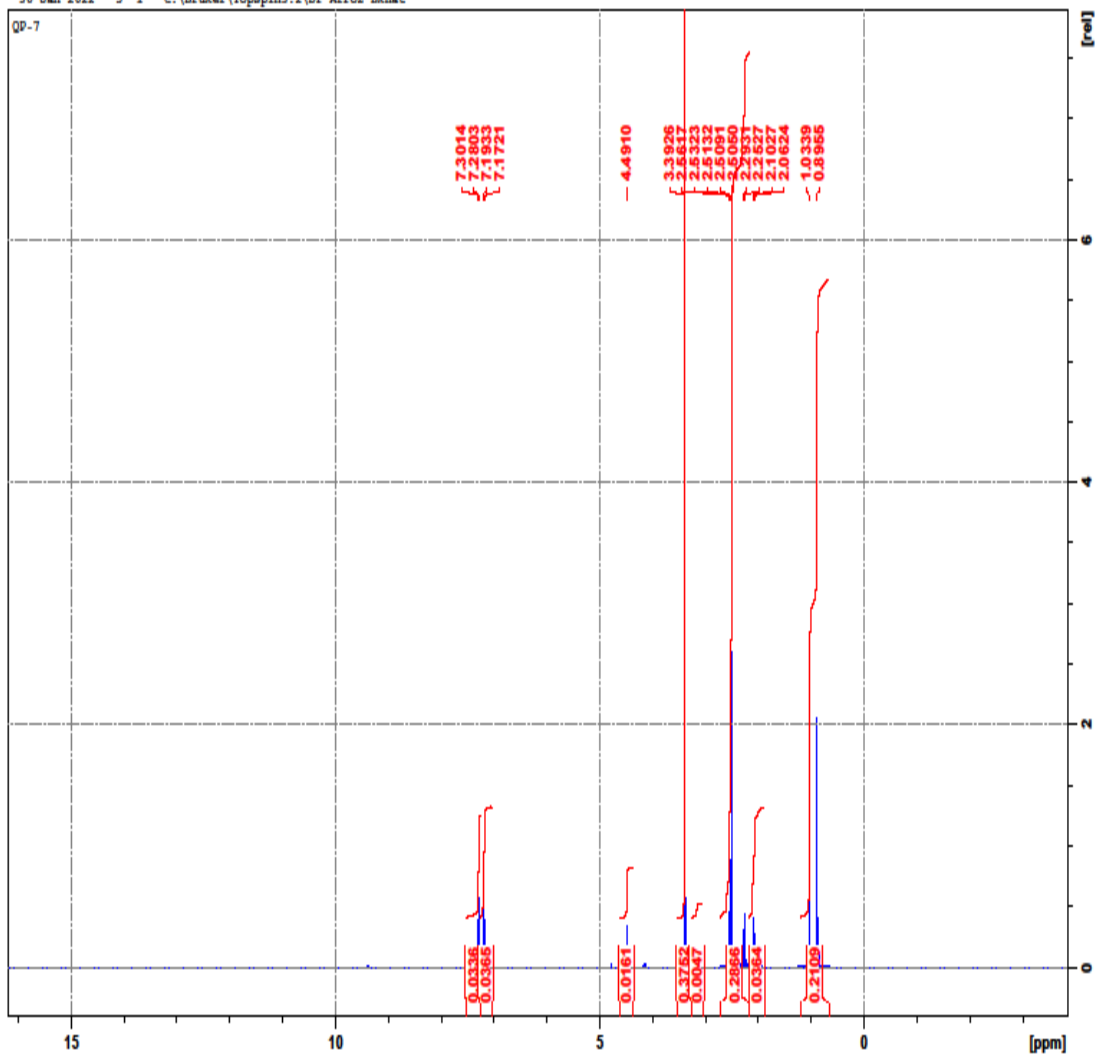

# 4f-<sup>13</sup>CNMR

"30 Jan 2022" 8 1 "C:\Bruker\Topspin3.2\Dr Afroz Bkhat"

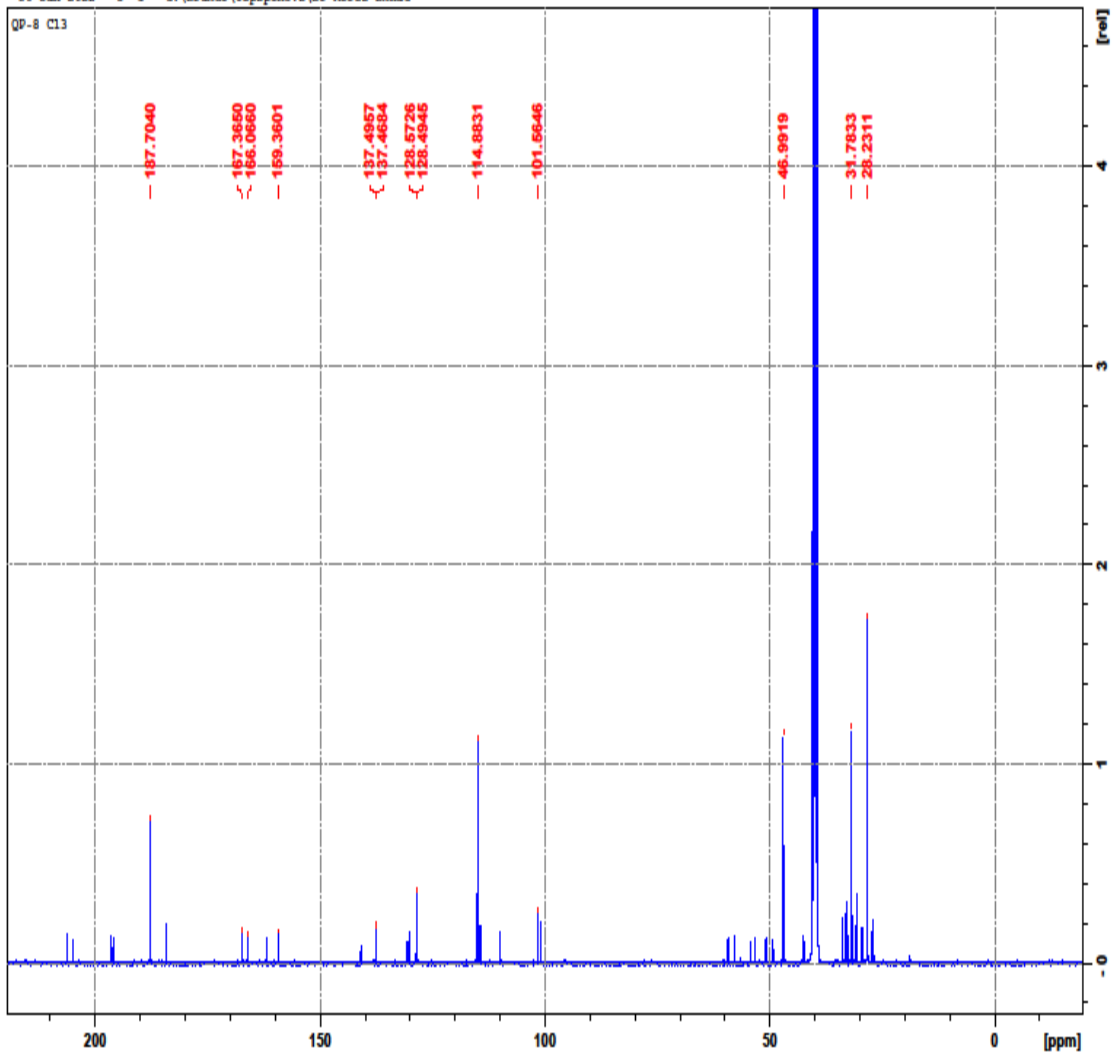

# 4f-HNMR

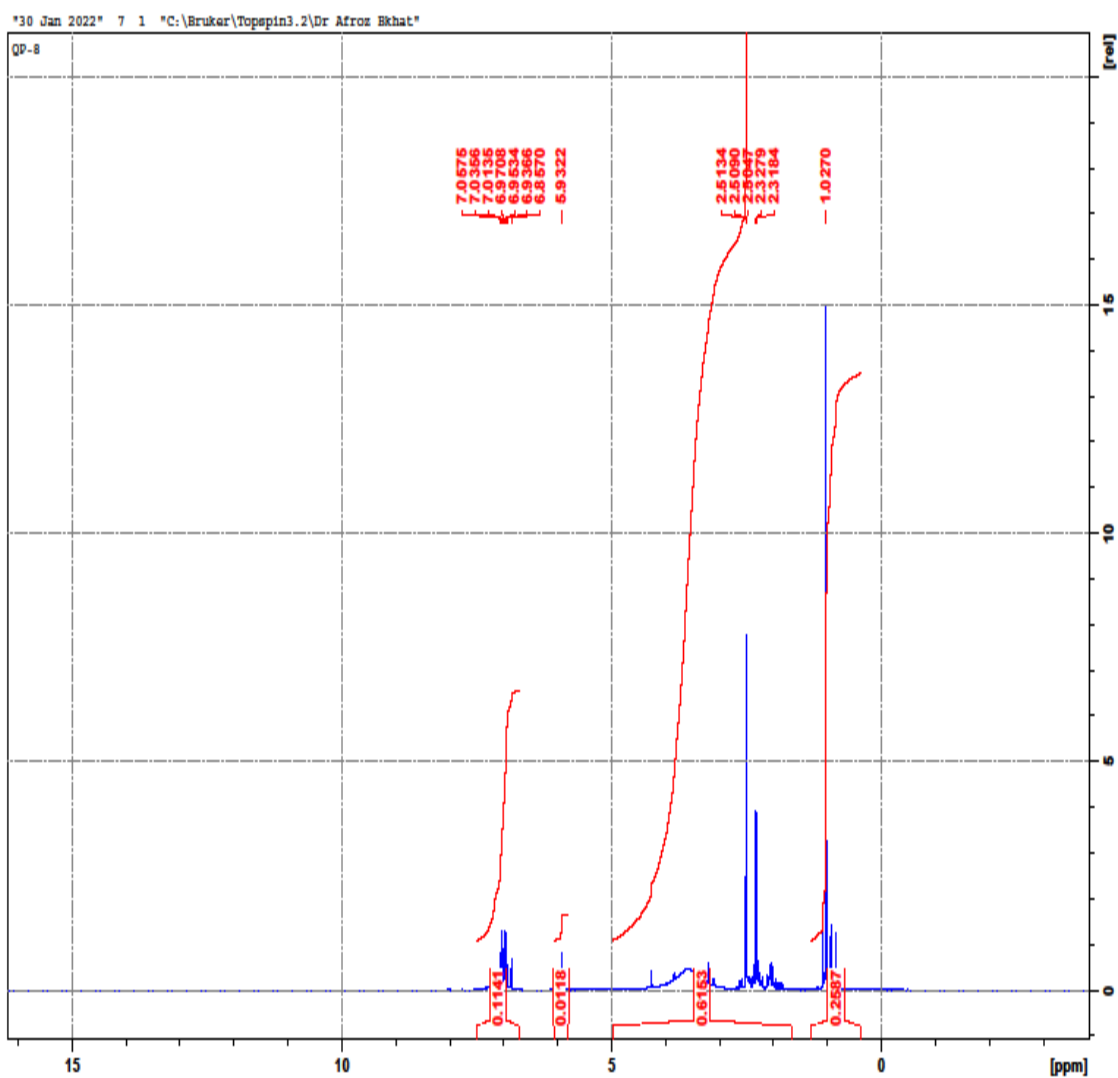

# 4g-<sup>13</sup>CNMR

"31 Jan 2022" 5 1 "C:\Bruker\Topspin3.2\Dr Afroz Bkhat"

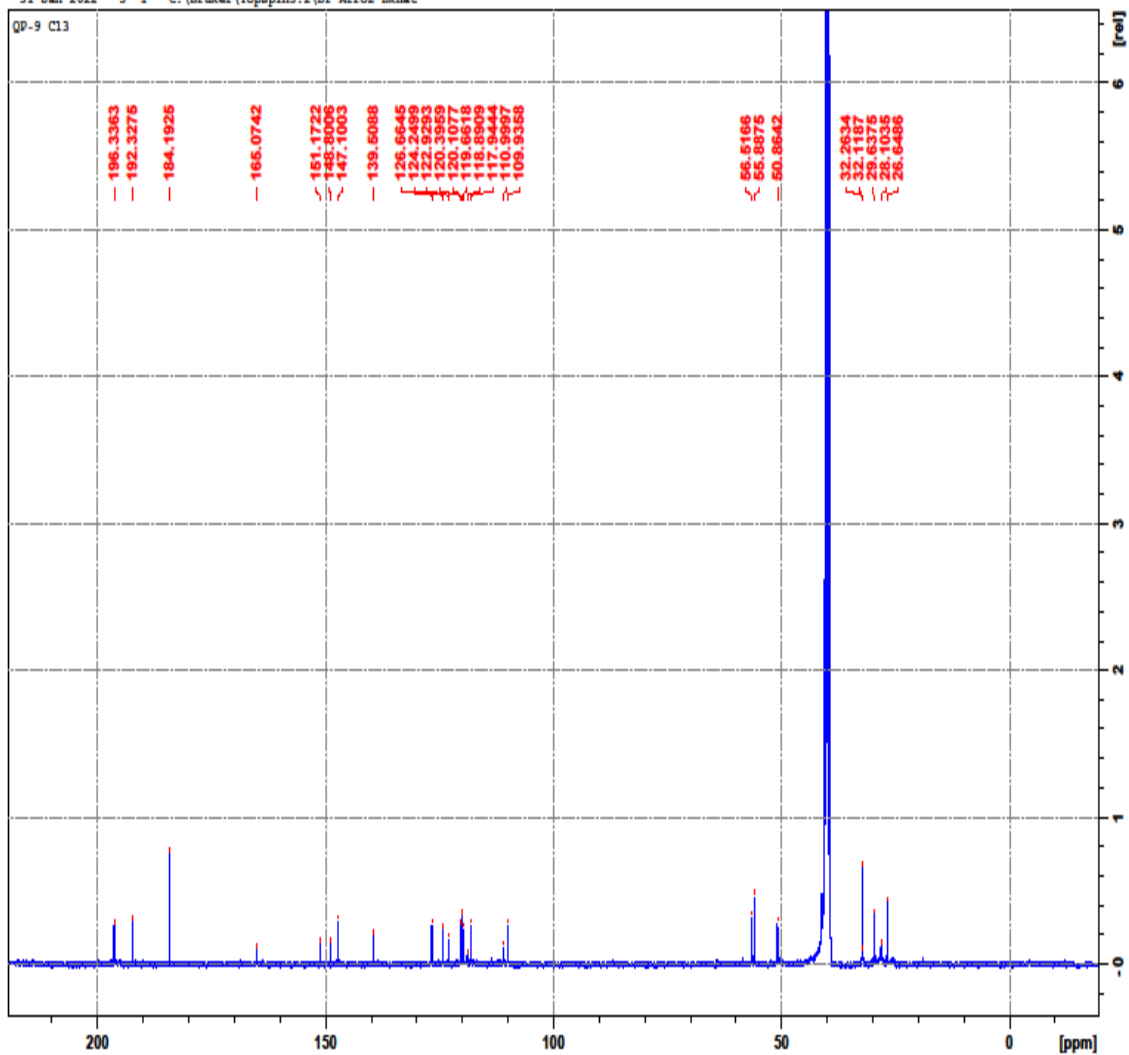



# 4g-HNMR

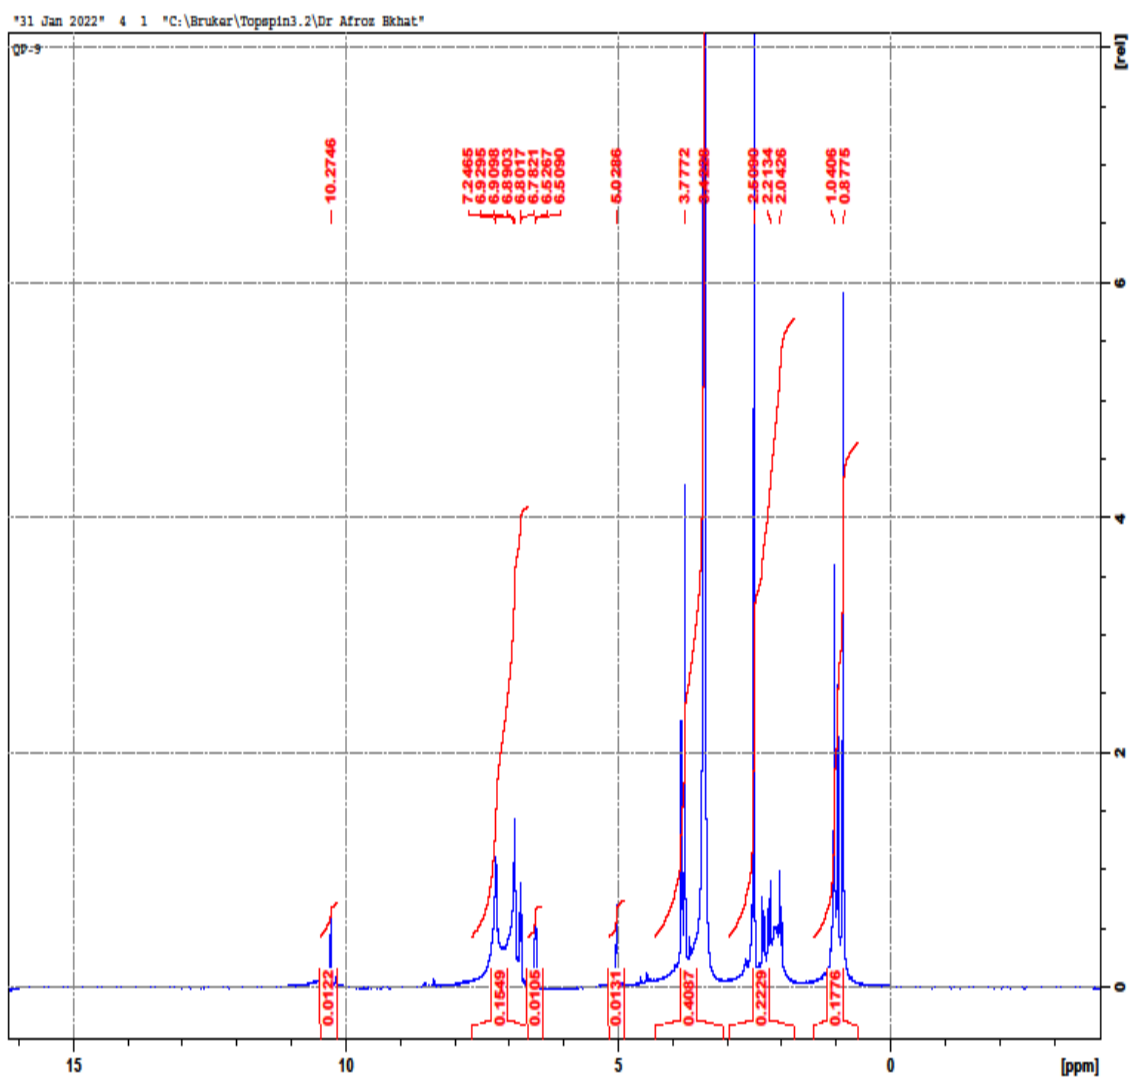

# 4h-<sup>13</sup>CNMR

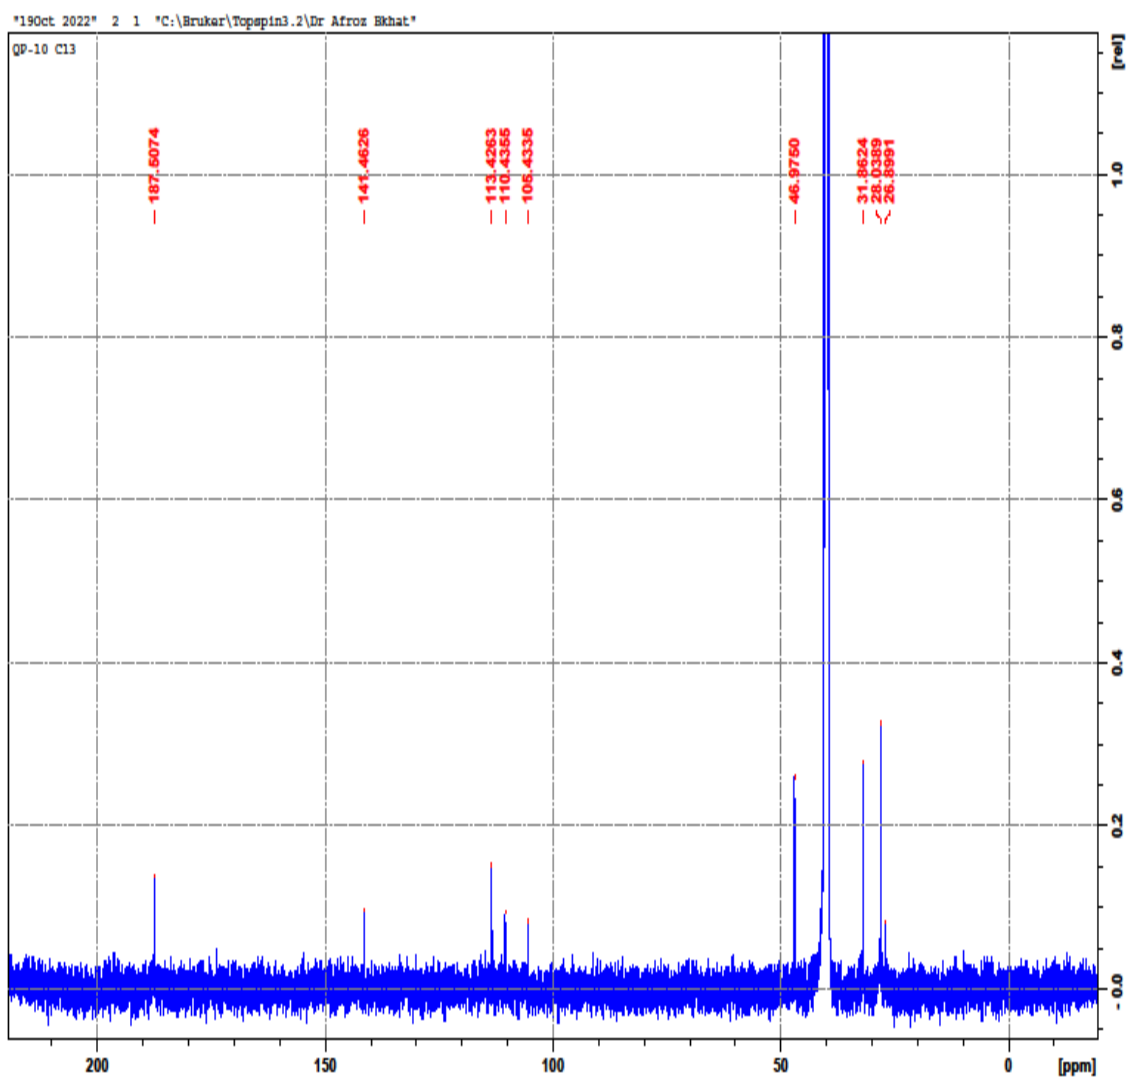

# 4h-HNMR

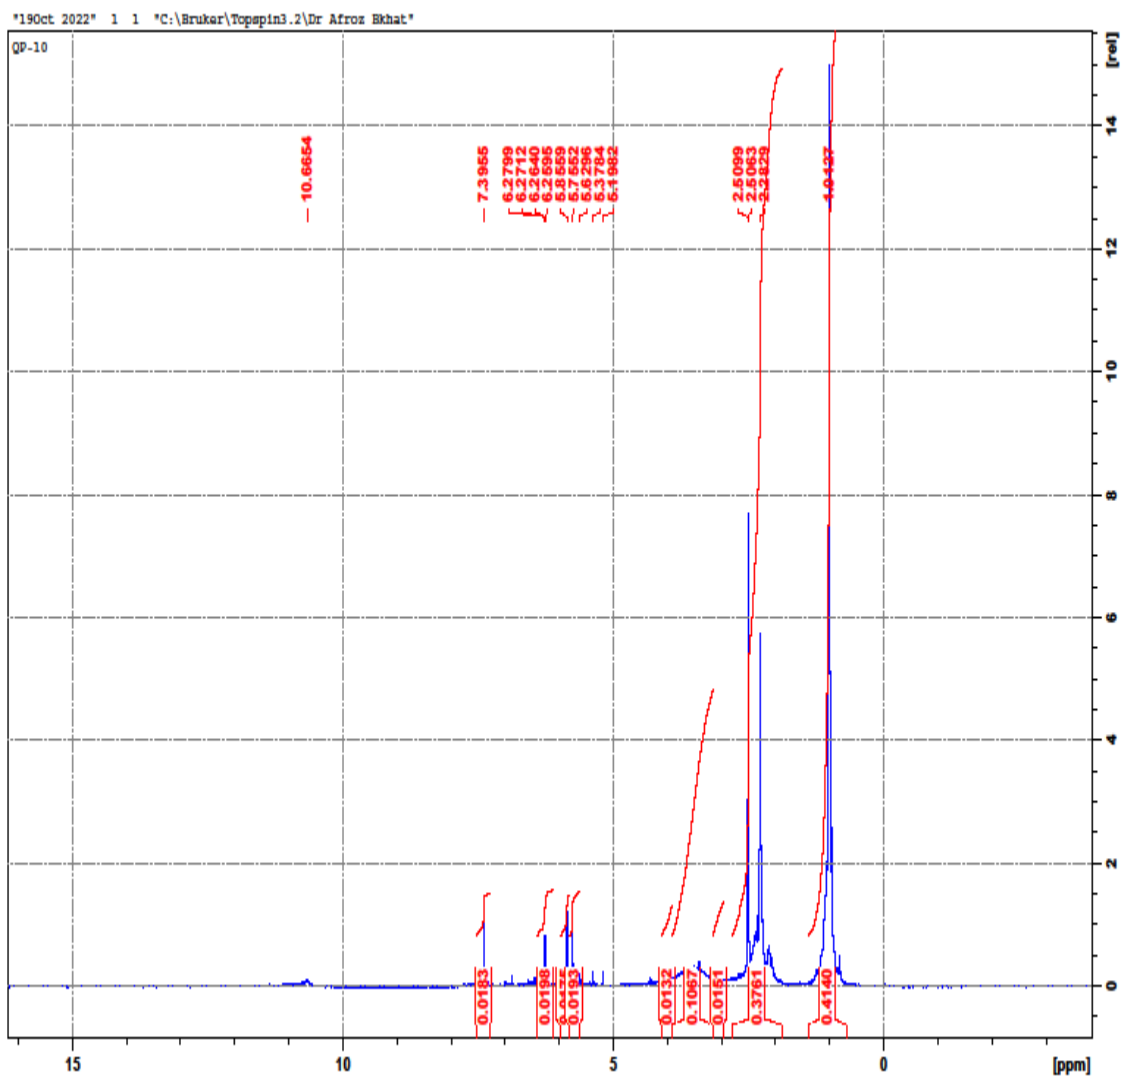

Supplement: s1 [file s1]
